# Supplementary material for: Flexibilide Obtained from Cultured Soft Coral Has Anti-Neuroinflammatory and Analgesic Effects through the Upregulation of Spinal Transforming Growth Factor-β1 in Neuropathic Rats
Source: MDPI journal article supplement (doi:10.3390/md12073792), 2014-06-27
Supplement: s1 [file s1]

# Supplementary Information

Figure S1.  $^1\text{H-NMR}$  spectrum of flexibilide in  $\text{CDCl}_3$  at 400 MHz.

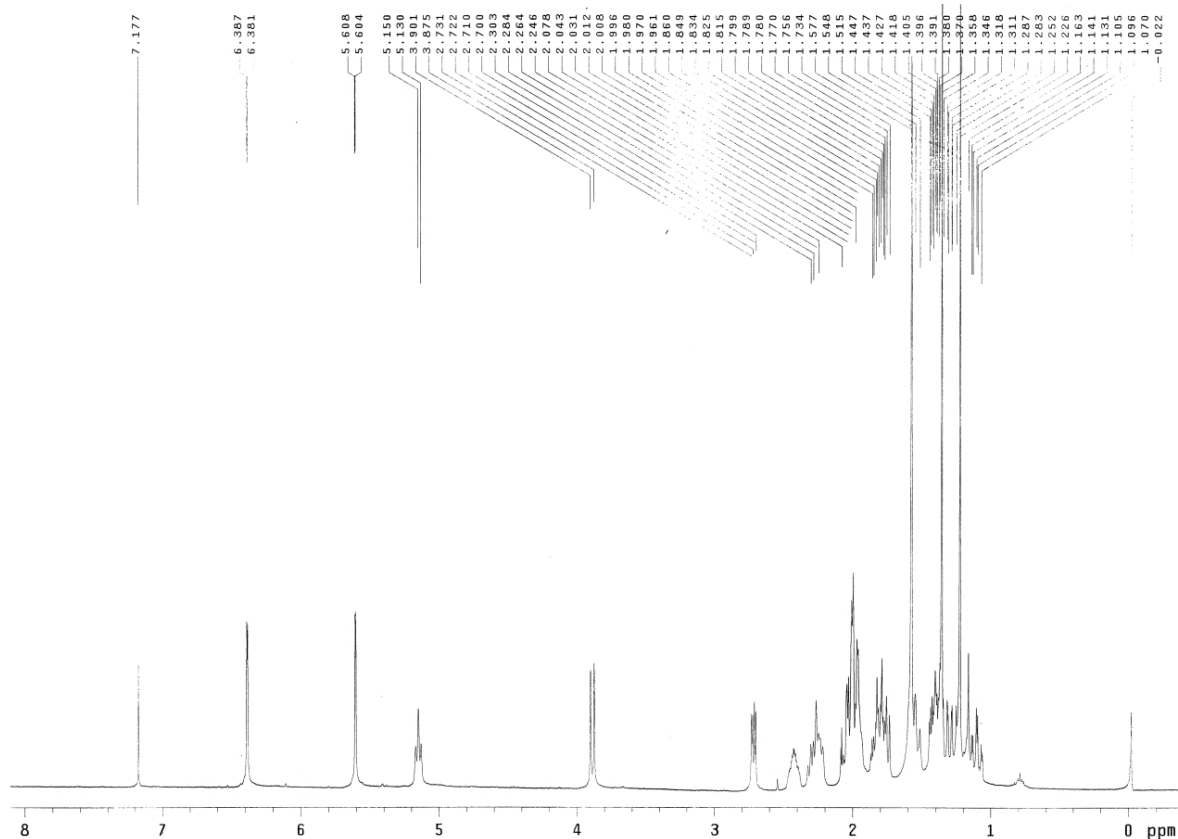

Figure S2.  $^{13}\text{C-NMR}$  spectrum of flexibilide in  $\text{CDCl}_3$  at 100 MHz.

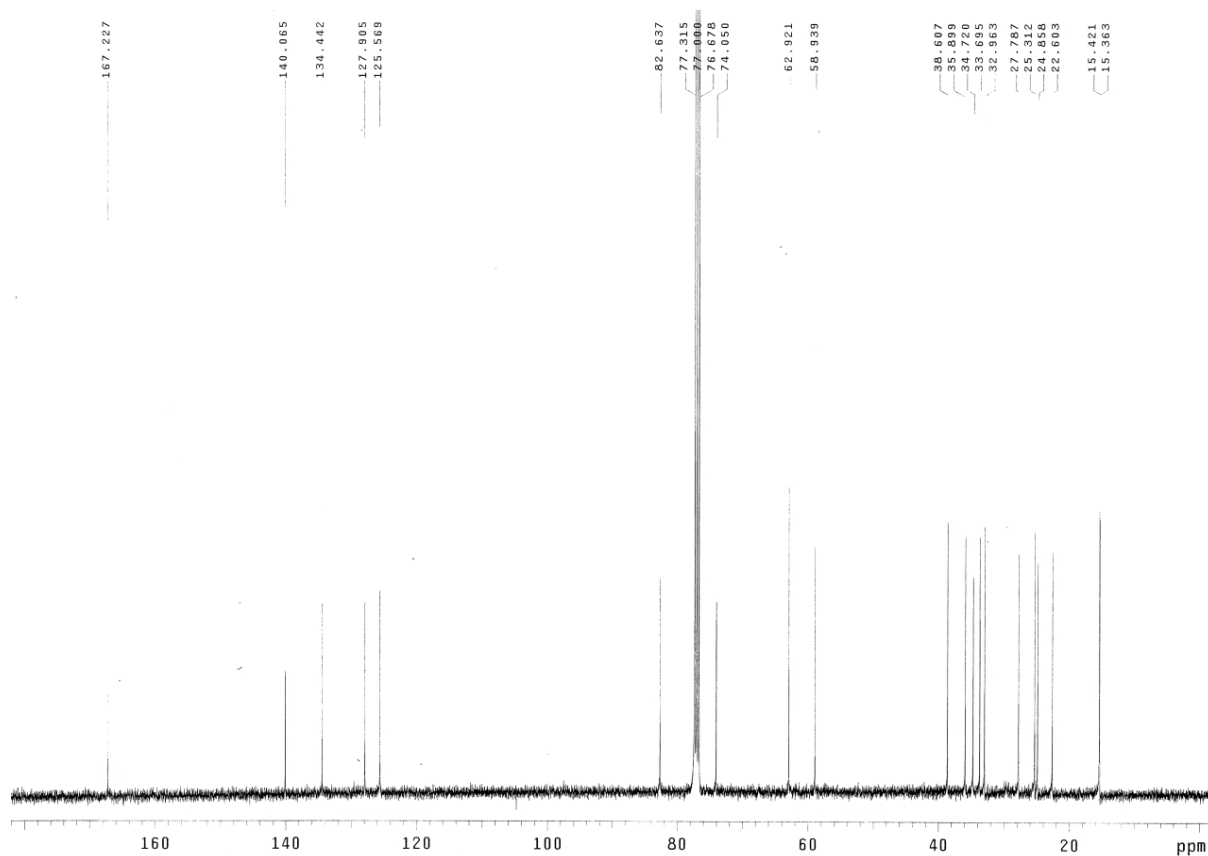

**Figure S3.** ESIMS spectrum ( $m/z$  357  $[M + Na]^+$ ) of flexibilide.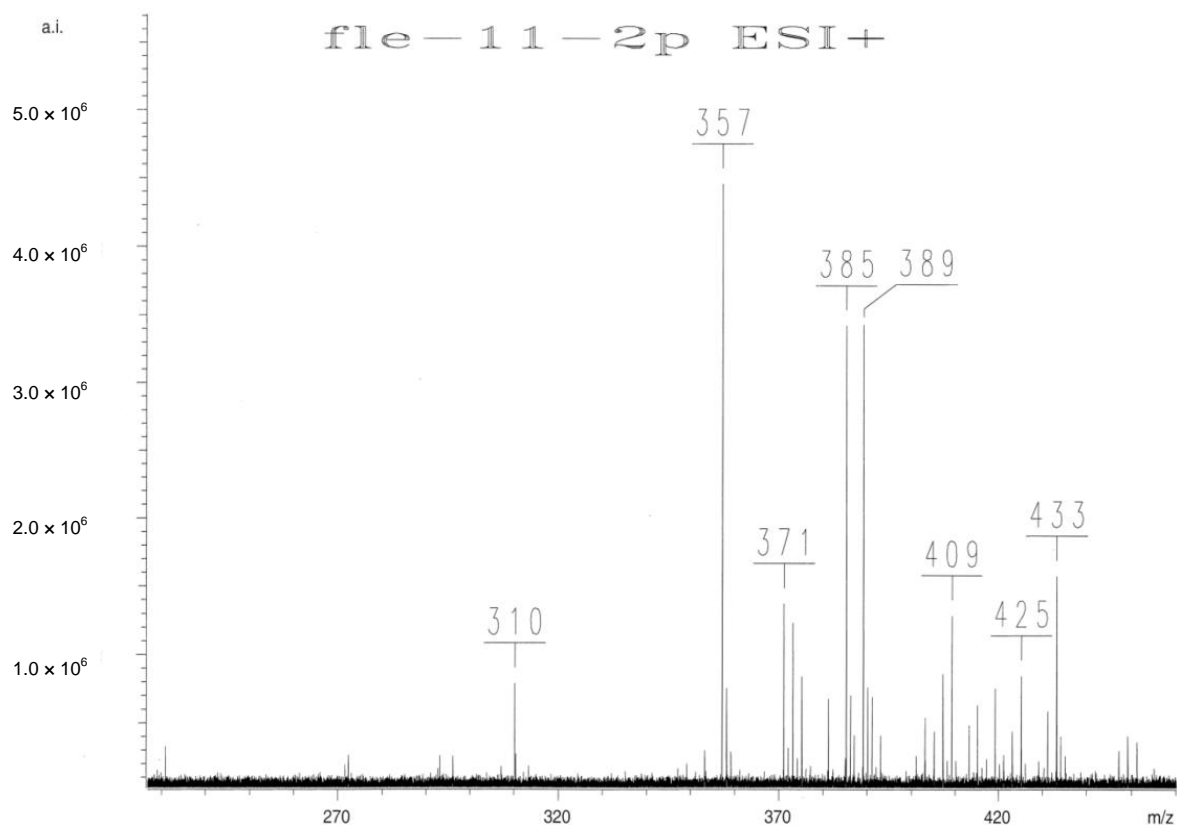

© 2014 by the authors; licensee MDPI, Basel, Switzerland. This article is an open access article distributed under the terms and conditions of the Creative Commons Attribution license (<http://creativecommons.org/licenses/by/3.0/>).
